## REVIEW

### ROLES OF GASTRIC GATA DNA-BINDING PROTEINS

MASATOMO MAEDA<sup>1</sup>, KENTARO KUBO<sup>2</sup>, TSUYOSHI NISHI<sup>2</sup> AND MASAMITSU FUTAI<sup>2</sup>

<sup>1</sup>Laboratory of Biochemistry, Faculty of Pharmaceutical Sciences, Osaka University, Suita, Osaka 565, Japan and

<sup>2</sup>Department of Biological Sciences, The Institute of Scientific and Industrial Research, Osaka University, Ibaraki, Osaka 567, Japan

Accepted 13 November 1995

#### Summary

The gastric H<sup>+</sup>/K<sup>+</sup>-ATPase is a P-type ATPase that is specifically expressed in gastric parietal cells and is responsible for acid secretion into the stomach. We have found one or more gastric mucosal nuclear proteins that recognize a sequence motif in the 5'-upstream regions of the H<sup>+</sup>/K<sup>+</sup>-ATPase  $\alpha$ - and  $\beta$ -subunit genes. This gastric motif, (G/C)PuPu(G/C)NGAT(A/T)PuPy, may be a binding site for a positive transcriptional regulator that functions specifically in parietal cells. We further demonstrated using cDNA cloning and *in situ* hybridization that novel zinc-finger proteins (GATA-GT1 and GATA-

GT2) are present in the gastric parietal cells and bind to this motif. The proteins activate the transcription of the reporter gene with the 5'-upstream region of the H<sup>+</sup>/K<sup>+</sup>-ATPase  $\beta$ -subunit gene. These results suggest that gastric GATA DNA-binding proteins have important roles in transcriptional activation of H<sup>+</sup>/K<sup>+</sup>-ATPase genes in the parietal cells.

Key words: stomach, parietal cell, GATA factor, zinc-finger protein, H<sup>+</sup>/K<sup>+</sup>-ATPase, cell-specific transcription.

#### Introduction

The highly differentiated gastric parietal cell has a characteristic morphology and is specialized for hydrochloric acid secretion into the stomach lumen. The major enzyme in this system is an ATP-driven, P-type proton pump (H<sup>+</sup>/K<sup>+</sup>-ATPase), which is responsible for proton translocation across the apical plasma membrane (Chow and Forte, 1995; Hirschowitz *et al.* 1995). The genes and cDNA for the ATPase  $\alpha$ - and  $\beta$ -subunits have been cloned and sequenced (Shull and Lingrel, 1986; Maeda *et al.* 1988, 1990, 1991; Canfield *et al.* 1990; Newman *et al.* 1990; Reuben *et al.* 1990; Shull, 1990; Toh *et al.* 1990; Canfield and Levenson, 1991; Ma *et al.* 1991; Newman and Shull, 1991; Oshiman *et al.* 1991; Bamberg *et al.* 1992; Morley *et al.* 1992; Song *et al.* 1993; Yu *et al.* 1994). The amino acid sequences revealed that H<sup>+</sup>/K<sup>+</sup>-ATPase is closely related to Na<sup>+</sup>/K<sup>+</sup>-ATPase. Most of the positions of introns in the H<sup>+</sup>/K<sup>+</sup>-ATPase  $\alpha$ -subunit gene are essentially the same as those in the Na<sup>+</sup>/K<sup>+</sup>-ATPase gene (Maeda *et al.* 1990; Newman *et al.* 1990). Similar results were obtained for the  $\beta$ -subunits of the two enzymes (Canfield and Levenson, 1991; Maeda *et al.* 1991; Newman and Shull, 1991; Morley *et al.* 1992). The similarities in the intron/exon organization and primary structure suggest that the  $\alpha$ - and  $\beta$ -subunit genes of the two ATPases were derived from respective common ancestors.

In contrast, as expected from the gastric-specific expression,

the 5'-upstream sequences of the H<sup>+</sup>/K<sup>+</sup>-ATPase genes were different from those of Na<sup>+</sup>/K<sup>+</sup>-ATPase. Our earlier studies (Maeda *et al.* 1991; Oshiman *et al.* 1991; Tamura *et al.* 1992) demonstrated that a DNA sequence motif, (G/C)PuPu(G/C)NGAT(A/T)PuPy, was present in both the  $\alpha$ - and  $\beta$ -subunit genes from human and rat (Fig. 1). The motif was recognized by DNA-binding protein(s) from stomach but not by ones from other tissues. Interestingly, the gastric motif includes the (T/A)GATA(G/A) sequence recognized by the GATA-binding proteins (Orkin, 1990), a group of zinc-finger [amino acid stretches featuring regularly spaced pairs of cysteines and histidines or differently arranged cysteines around zinc(II) ions] transcriptional factors implicated in the gene regulation of haematopoietic and several nonhaematopoietic cell types. The similarity of the DNA sequences recognized by the gastric-specific proteins and the GATA-binding proteins led us to postulate that the gastric proteins have similar zinc-finger domains with tandem CX<sub>2</sub>C-X<sub>17</sub>-CX<sub>2</sub>C motifs.

#### Novel gastric DNA-binding proteins with zinc-finger domains

Degenerate primers were synthesized from the completely conserved sequences in the zinc-finger domains (119 amino

Fig. 1. Locations of the gastric motif in the 5'-upstream regions of the H<sup>+</sup>/K<sup>+</sup>-ATPase  $\alpha$ - and  $\beta$ -subunit genes. The consensus DNA sequence [gastric motif, (G/C)PuPu(G/C)NGAT(A/T)PuPy] that binds gastric nuclear proteins was identified and compared with the 5'-upstream recognition sites of the human  $\alpha$ - and rat  $\alpha$ - and  $\beta$ -subunit genes (Tamura *et al.* 1992) (left). The locations of the gastric motif (green boxes) in the subunit genes are shown schematically together with TATA-boxes. Arrows indicate the transcription start sites (right).

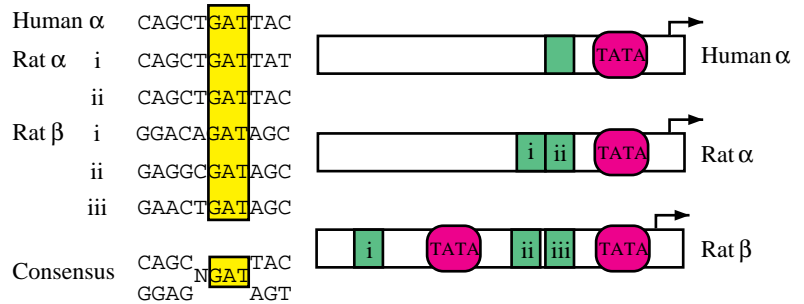

acid residues) (Zon *et al.* 1991) of the mammalian and chicken GATA-binding proteins, GATA-1, GATA-2 and GATA-3 (Table 1). The primers were combined with cDNA synthesized from pig (adult) gastric mucosa poly-A RNA (prepared from tissue being excised in a local slaughterhouse and immediately frozen) and then PCR (polymerase chain reaction) was carried out. Zinc-finger segments of the expected length were cloned and sequenced (Tamura *et al.* 1993). Surprisingly, three novel zinc-finger segments were identified in addition to GATA-2 and GATA-3: the translated sequences were very similar to those of the previously known GATA-binding proteins and were named GATA-GT1, GATA-GT2 and GATA-GT3 (GT, Gastrointestinal Tract) (Fig. 2). The primary structures of GATA-GT1 and GATA-GT2 were determined from the nucleotide sequences of full-length cDNAs, cloned from rat stomach cDNA library (5-week-old male Sprague-Dawley rat) using PCR-amplified sequences as probes. A clone for GATA-GT3 could not be obtained, possibly because of its low transcriptional level. A similar PCR method applied to yeast chromosomal DNA

failed to amplify the sequence corresponding to the domain with tandem zinc-finger motifs, suggesting that yeast may only have GATA-binding proteins with a single zinc-finger motif (Cunningham and Cooper, 1991; Minehart and Magasanik, 1991).

### Structures of GATA-GT1 and GATA-GT2

The gastric GATA proteins [GATA-GT1 (391 amino acid residues) and GATA-GT2 (440 amino acid residues)] (Tamura *et al.* 1993) had distinct zinc-finger motifs, CX<sub>2</sub>C-X<sub>17</sub>-CX<sub>2</sub>C, that were repeated twice in the middle of the primary structure (Fig. 3A,B). GATA-GT1 and GATA-GT2 constitute two new members of the 'GATA-binding protein' family (Table 1) and, like GATA-1, GATA-2 and GATA-3, they may regulate transcription through the DNA-binding ability of the zinc-finger domains. Currently six GATA-binding proteins have been reported in vertebrates (Table 1). Pairwise comparisons of the family members indicated that the zinc-finger domains were more than 70% conserved, but the remainder of the

Table 1. List of GATA-binding protein family members

| Name                            | Sites of expression                                                                                                                      | Target genes                                                                                                                                                    |
|---------------------------------|------------------------------------------------------------------------------------------------------------------------------------------|-----------------------------------------------------------------------------------------------------------------------------------------------------------------|
| GATA-1<br>(=Eryf1, GF-1, NFE1a) | Erythroid cell, mast cell, megakaryocyte, eosinophil, testis (Sertoli cell)                                                              | Globins, erythropoietin receptor, haem biosynthetic enzymes, glycoprotein IIb, <i>HOXB2</i>                                                                     |
| GATA-2<br>(=NFE1b)              | Endothelial cell, erythroid progenitor, mast cell, megakaryocyte, fibroblast, monocyte, kidney, embryo (brain, cardiac muscle and liver) | Preproendothelin-1                                                                                                                                              |
| GATA-3<br>(=NFE1c)              | T-cell, mast cell, kidney, embryonic brain                                                                                               | T-cell receptors                                                                                                                                                |
| GATA-GT1<br>(= GATA-6)          | Stomach (parietal cell), intestine, heart, ovary, lung, liver                                                                            | Gastric proton pump ( $\alpha$ - and $\beta$ -subunits)                                                                                                         |
| GATA-GT2<br>(= GATA-4)          | Cardiac myocyte, testis, ovary, intestine, stomach (parietal cell), primitive endoderm                                                   | Natriuretic peptide (A- and P-types), cardiac-muscle-specific troponin C, $\alpha$ -myosin heavy chain, gastric proton pump ( $\alpha$ - and $\beta$ -subunits) |
| GATA-5                          | Heart, testis, ovary, intestine, stomach, lung, spleen, liver, gall bladder                                                              |                                                                                                                                                                 |

Various vertebrate GATA-binding proteins are listed. Their sites of expression and potential target genes are summarized. Cited from the following references: GATA-1, Yamamoto *et al.* (1990), Ito *et al.* (1993), Martin *et al.* (1993) and Vieille-Grosjean and Huber (1995); GATA-2, Yamamoto *et al.* (1990) and Lee *et al.* (1991); GATA-3, Yamamoto *et al.* (1990); GATA-GT1, Tamura *et al.* (1993) and Laverriere *et al.* (1994); GATA-GT2, Tamura *et al.* (1993), Arceci *et al.* (1993), Hon *et al.* (1994), Grépin *et al.* (1994), Molkenin *et al.* (1994) and Laverriere *et al.* (1994); GATA-5, Laverriere *et al.* (1994).

GATA-1 LYHKMNGQNRPLIRPKKRLIVSKRAGTQCTNQCQTTTTLWRRNASGD  
 GATA-2 F---K-----K--R--SAAR---C-A-----N--  
 GATA-3 -----K--R--SAAR---S-A-----N--  
 GATA-GT1 --S---LS---K-QK-VPSSR-L-LS-A--H-----E-E  
 GATA-GT2 -----I---K-QR--SASR-V-LS-A-----E-E  
 GATA-GT3 --S---RLS---K-QR--SASR-V-LS-A-----E-E

Fig. 2. Alignment of the partial zinc-finger domains deduced from PCR-amplified cDNA sequences. cDNA of pig (gastric mucosa) was added to the PCR reaction mixture together with degenerate primers corresponding to conserved amino acid sequences of the zinc-finger domains of the GATA-binding proteins. The amino acid sequences deduced from the amplified DNA are shown (except for the sequences covered by the primers) together with the corresponding sequences of human GATA-1, GATA-2 and GATA-3 (Tamura *et al.* 1993). Only residues different from GATA-1 are indicated.

sequences exhibited lower similarity (less than about 30%, except for the 50% similarity between GATA-2 and GATA-3) (Fig. 4). This difference was clearly shown on Harr plot analyses, since straight lines were obtained only for zinc-finger motifs (Fig. 5). It should be noted that GATA-GT1 and GATA-GT2 correspond to GATA-6 and GATA-4, respectively, and *Xenopus laevis* GATA-4 was renamed GATA-5 (Laverriere *et al.* 1994).

Despite the differences in the sequences outside the zinc-finger domains, the amino acid compositions of all GATA-

binding proteins have common features. They are rich in Ser and Thr residues (as high as 20% of the total) and in Pro (approximately 10%). The high content of  $\alpha$ -helix breakers (Pro) and  $\beta$ -sheet breakers (Ser and Pro) suggests that the proteins are quite flexible. S(T)PXX, a motif typical for transcriptional regulatory proteins (Suzuki, 1989), was also scattered throughout the entire sequence. In contrast to other GATA-binding proteins, GATA-GT1 and GATA-GT2 had clusters of His and Ala residues, respectively (Fig. 3A,B). Furthermore, hydrophobic residues appeared at every seven residues of the carboxyl-terminal region of GATA-GT2, a distribution similar to that in Leu-zipper proteins (Landschultz *et al.* 1988). These characteristics of GATA-GT1 and GATA-GT2 may be important for their specific interaction with other regulator proteins and DNA motifs and for their unique role(s) in gastric tissue.

**Tissue distribution of GATA-GT1 and GATA-GT2 mRNAs**

Using a specific probe (outside the zinc-finger domains of GATA-GT1 and GATA-GT2), a strong hybridization signal was observed with stomach RNA but not with RNA from brain, heart, liver, kidney, spleen or lung (Tamura *et al.* 1993). A weak but significant signal was detected with intestinal

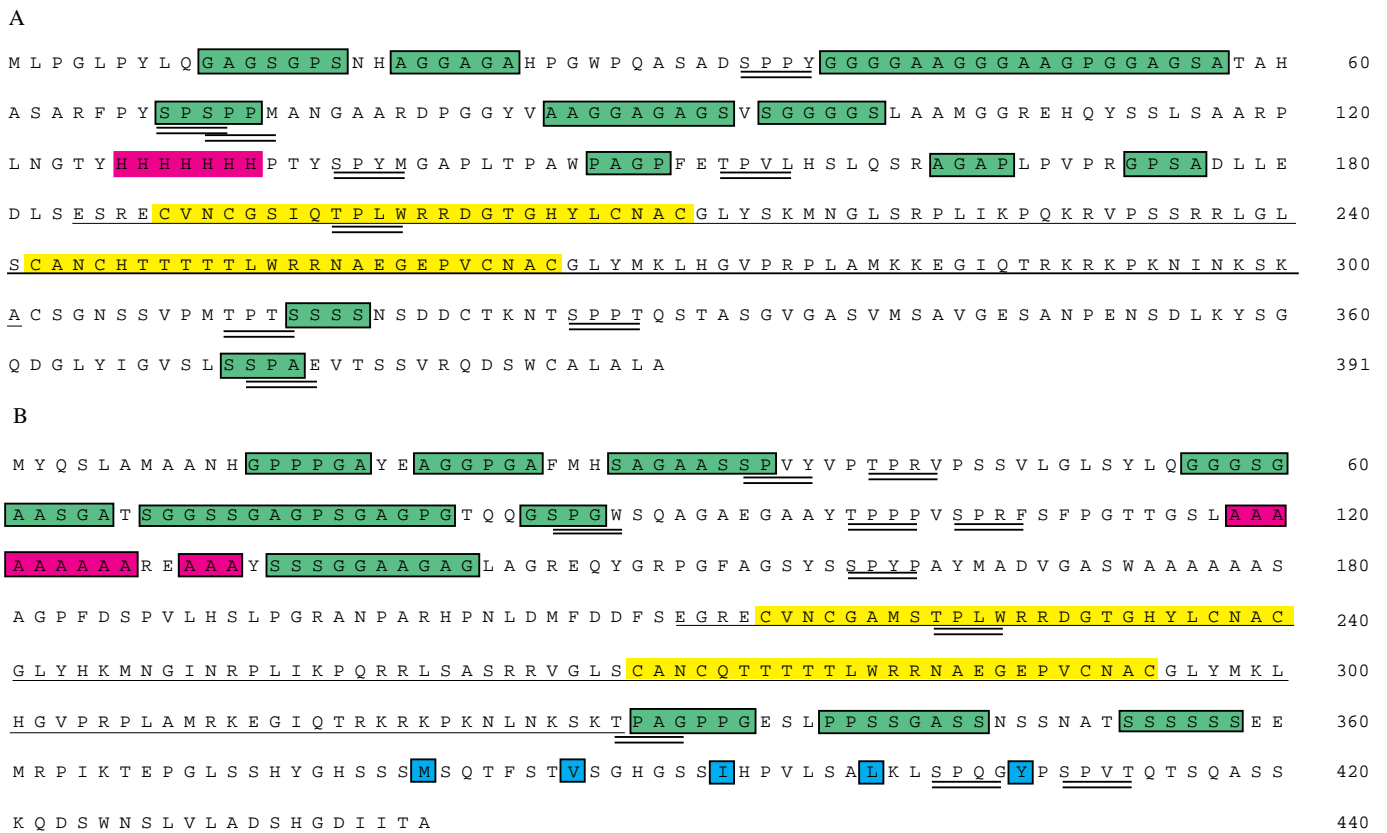

Fig. 3. Amino acid sequences of rat GATA-GT1 (A) and GATA-GT2 (B) (Tamura *et al.* 1993). Zinc-finger domains are underlined. Zinc-finger motifs (CX<sub>2</sub>C-X<sub>17</sub>-CX<sub>2</sub>C) are coloured yellow. Green boxes indicate Ala-, Gly-, Pro- and Ser-rich sequences. The His cluster in GATA-GT1 and Ala clusters in GATA-GT2 are shown by pink boxes. S(T)PXX motifs are doubly underlined. Hydrophobic residues located at every seven residues of the GATA-GT2 carboxyl-terminal region are coloured blue.

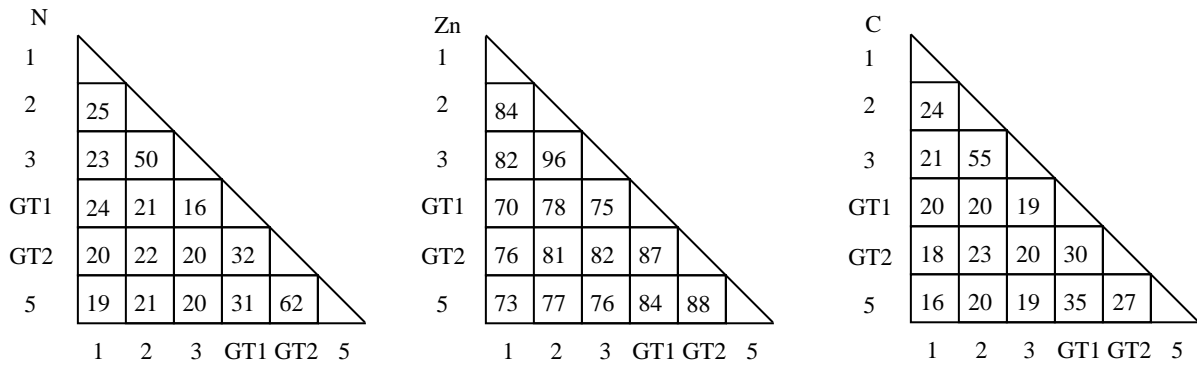

Fig. 4. Conservation of the amino acid residues in the amino-terminal, zinc-finger and carboxyl-terminal domains of various GATA-binding proteins. Identical amino acid residues between each pair of GATA-binding protein domains (N, amino-terminal domain; Zn, zinc-finger domain; C, carboxyl-terminal domain) are indicated by percentage values. 1, human GATA-1 (Zon *et al.* 1990; Trainor *et al.* 1990); 2, human GATA-2 (Lee *et al.* 1991; Dorfman *et al.* 1992); 3, human GATA-3 (Ho *et al.* 1991; Joulin *et al.* 1991); GT1, rat GATA-GT1 (Tamura *et al.* 1993); GT2, rat GATA-GT2 (Tamura *et al.* 1993); 5, chicken GATA-5 (Laverriere *et al.* 1994).

RNA. In addition, a very weak signal for GATA-GT2 was detectable with RNA from testis. The GATA-GT1 and GATA-GT2 mRNAs were predominantly expressed in the gastric mucosa but not in the underlying muscular layer. To determine the cellular distribution of the mRNAs, rat stomach slices were subjected to *in situ* hybridization (Mushiaki *et al.* 1994). The results indicated that GATA-GT1 and GATA-GT2, as well as the H<sup>+</sup>/K<sup>+</sup>-ATPase  $\alpha$ -subunit, are expressed specifically in gastric parietal cells. However, an intrinsic factor (vitamin B<sub>12</sub> binding protein) transcript was found only in gastric chief cells (Maeda *et al.* 1995). The tissue distribution and potential target genes of the 'GATA-binding protein' family are summarized in Table 1. The proteins of this family showed separate or overlapping expression patterns. GATA-GT2 was also expressed in cardiac myocytes (Arceci *et al.* 1993; Grépin *et al.* 1994). The presence of the same GATA protein in different tissues suggests that other

tissue-specific factor(s) may assist GATA protein function(s) (Merika and Orkin, 1995).

#### Binding of GATA-GT1 and GATA-GT2 to the gastric DNA sequence motif

In the GATA-1 protein, a zinc-finger motif located on the carboxyl side was determined to be responsible for DNA binding to the (T/A)GATA(G/A) motif (Yang and Evance, 1992). Do GATA-GT1 and GATA-GT2 bind to the gastric sequence motif, (G/C)PuPu(G/C)NGAT(A/T)PuPy, commonly located upstream of the H<sup>+</sup>/K<sup>+</sup>-ATPase genes (Fig. 1)? In a previous experiment, only the binding of GATA-GT2 to this motif could be detected, and the negative results with GATA-GT1 may possibly be due to low expression and/or proteolytic degradation of the full-length protein in *Escherichia coli* (Tamura *et al.* 1992). Thus, we

Fig. 5. Comparison of the amino acid sequence of GATA-GT1 with those of other GATA-binding proteins. The amino acid sequence of rat GATA-GT1 was compared with those of rat GATA-GT2 (A), human GATA-1 (B), human GATA-2 (C), human GATA-3 (D) and chicken GATA-5 (E) using a Harr plot program (GENETYX; Software Development Co., Japan). The y-axis (from top to bottom) refers to amino acid residue number from the amino terminus of GATA-GT1. The residue numbers of GATA-GT2, GATA-1, GATA-2, GATA-3 and GATA-5 are shown on the x-axis (from left to right) in A–E, respectively. Certain residues on the x- and y-axes were selected and centred at a span of 11 residues. Such short sequences for a pair of GATA proteins were compared. Each dot was generated when more than six identical residues were found within a span.

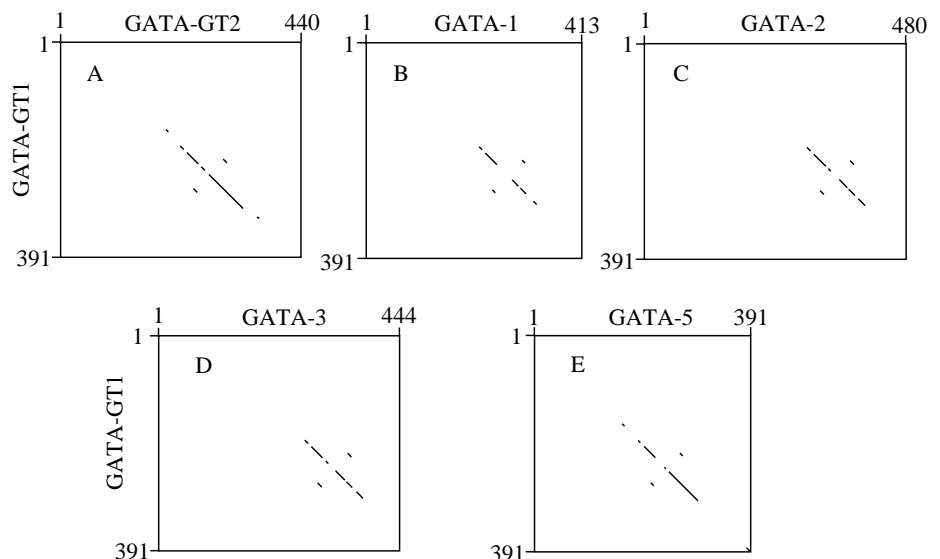

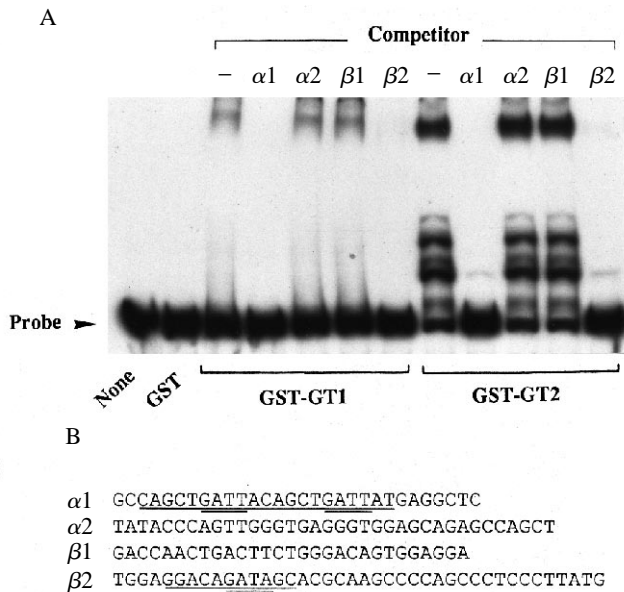

Fig. 6. DNA-binding of fusion proteins carrying truncated GATA-GT1 and GATA-GT2. The DNA binding of fusion proteins carrying truncated GATA-GT1 (GST-GT1) and GATA-GT2 (GST-GT2) was examined by means of a gel retardation assay (Tamura *et al.* 1992). A large number of fusion proteins could be expressed in *Escherichia coli* and were easily prepared. (A) Affinity-purified fusion proteins (0.4  $\mu$ g) were incubated with a radiolabelled DNA probe (100 Bq) encoding the gastric motif from the rat  $H^+/K^+$ -ATPase  $\beta$ -subunit gene [199 bp *StyI*-*PstI* fragment (Maeda *et al.* 1991)]. None, radioactive probe without protein; GST, the probe plus glutathione *S*-transferase; GST-GT1, the probe plus GATA-GT1 fusion protein; GST-GT2, the probe plus GATA-GT2 fusion protein. The shifted bands due to protein binding to the probe [competitor (-)] disappeared when competitors  $\alpha 1$  and  $\beta 2$  were added. Unrelated DNA sequence  $\alpha 2$  and  $\beta 1$  failed to bind to the fusion proteins. GST-GT2 gave several shifted bands possibly as a result of protein degradation. (B) The nucleotide sequences for  $\alpha 1$  and  $\alpha 2$  (sequences from rat  $\alpha$ -subunit gene) and  $\beta 1$  and  $\beta 2$  (sequences from rat  $\beta$ -subunit gene) (Tamura *et al.* 1992). Gastric motifs are underlined. GAT(A/T) sequences are double underlined.

constructed an expression system for a fusion gene comprising a partial sequence of GATA-GT1 (Ser-32 to Ala-391) or GATA-GT2 (Glu-128 to Gly-369) with glutathione *S*-transferase. Both fusion proteins were expressed in *Escherichia coli* cells and purified using a glutathione affinity column. For the binding assays, the upstream region of the  $H^+/K^+$ -ATPase  $\beta$ -subunit gene (Maeda *et al.* 1991) was radiolabelled as a probe (Fig. 6A). Mobility of the  $\beta$ -subunit gene fragment was clearly retarded after preincubation with the GATA-GT1 and GATA-GT2 fusion proteins [Fig. 6A, competitor (-) for GST-GT1 and GST-GT2], but not with the control glutathione *S*-transferase (Fig. 6A, GST), suggesting that both GATA protein sequences could bind to the probe DNA. DNA segments having the gastric sequence motif,  $\alpha 1$  and  $\beta 2$  (Fig. 6B), from the control regions of the  $H^+/K^+$ -ATPase  $\alpha$ - and  $\beta$ -subunit

genes, respectively, competed for protein binding to the probe (Fig. 6A, competitors  $\alpha 1$  and  $\beta 2$ ), but DNA segments having no motif,  $\alpha 2$  and  $\beta 1$ , did not (Fig. 6A, competitors  $\alpha 2$  and  $\beta 1$ ). These results strongly suggest that GATA-GT1 and GATA-GT2 are proteins that recognize the gastric sequence motif and regulate cell-specific expression of the  $H^+/K^+$ -ATPase genes.

#### Potential phosphorylation sites for kinase-mediated regulation of GATA-binding proteins

Protein phosphorylation may participate in the activation of acid secretion from parietal cells: histamine stimulates the secretion of acid through elevation of the cytoplasmic cyclic AMP level; acetylcholine and gastrin affect the  $Ca^{2+}$  level (Hirschowitz *et al.* 1995). It is reasonable to assume that elevation of the second messenger levels activates protein kinases, resulting in modulation of the functions of gastric GATA-GT1 and GATA-GT2. Interestingly, protein kinase A phosphorylated a GATA-GT2 fusion protein (Glu-128 to Gly-367) with glutathione *S*-transferase, suggesting that Ser-261 (the only potential phosphorylation site) in the zinc-finger domain was phosphorylated. The corresponding position of GATA-GT1 (Ser-234) is a potential site for phosphorylation by both protein kinases A and C (Maeda, 1994). Since the second zinc-finger motif is postulated to be the DNA-binding site of the GATA-binding protein (Yang and Evance, 1992), phosphorylation and dephosphorylation near the second finger of GATA-GT1 and GATA-GT2 may affect their DNA binding and/or transcriptional activation. The different distributions of phosphorylation sites in the GATA-binding proteins (Maeda, 1994) suggest that the specific function of each protein family member may be regulated differently.

#### Transcriptional activation by gastric GATA DNA-binding proteins

Do upstream sequences of the  $H^+/K^+$ -ATPase subunit genes possess enhancers and promoter regions that are responsive to gastric GATA DNA-binding proteins? To test this possibility, the 3 kb upstream sequence of the rat  $\beta$ -subunit gene was ligated to the 5' side of the luciferase gene and then introduced into HeLa cells. The transfected cells expressed only a background level of luciferase activity. However, luciferase expression was enhanced significantly upon introduction of the expression plasmid of GATA-GT1 or GATA-GT2. These results suggest that the upstream region of the  $\beta$ -subunit gene contains a promoter that is activated by gastric GATA proteins (Fig. 7). We further demonstrated that the H2 receptor gene, which is expressed in parietal cells, is not controlled by GATA proteins (Nishi *et al.* 1995). Using this experimental system, the mechanism underlying the transcriptional activation, including the effects of protein phosphorylation, could be elucidated. Is the transcription of the  $\alpha$ - and  $\beta$ -subunit genes similarly regulated? The mechanism and regulation of subunit

Fig. 7. Schematic model of gastric-specific transcription. The potential role of gastric GATA-GT1 and GATA-GT2 in transcriptional activation of proton pump ( $H^+/K^+$ -ATPase) subunit genes is shown schematically. In eukaryotic cells, the RNA polymerase II (Pol II) transcription initiation complex is assembled in the core promoter, where transcription is initiated. The promoters for RNA polymerase II often contain a TATA-box, recognized by transcription factor IID (TFIID), located a short distance (about 30 base pairs) upstream of the transcription initiation site. A TFIID-promoter complex directs the ordered assembly onto the promoter of RNA polymerase II and other general initiation factors (shown attached to TFIID and Pol II in the figure) to create a multiprotein complex capable of initiating transcription. This initiation complex allows a basal level of transcription. However, the rate and extent of initiation complex formation increase upon binding of transcriptional activators to upstream activating sequence elements (Roeder, 1991; Ham *et al.* 1992). In the case of the proton pump  $\alpha$ - and  $\beta$ -subunit genes, we identified the element, gastric motif [(G/C)PuPu(G/C)NGAT(A/T)PuPy], located 30–60 base pairs upstream of the TATA boxes of the genes. Gastric GATA-binding proteins recognize the motif and may activate transcription by interacting directly or indirectly with the initiation complex. Recently, we have found that not only the upstream region of the  $\beta$ -subunit gene but also that of the  $\alpha$ -subunit gene contain promoters that are activated by gastric GATA-binding proteins. The Zn(II) ion is attracted to the cysteine residues (C) of the zinc-finger motif ( $CX_2C-X_{17}-CX_2C$ ) (Omichinski *et al.* 1993).

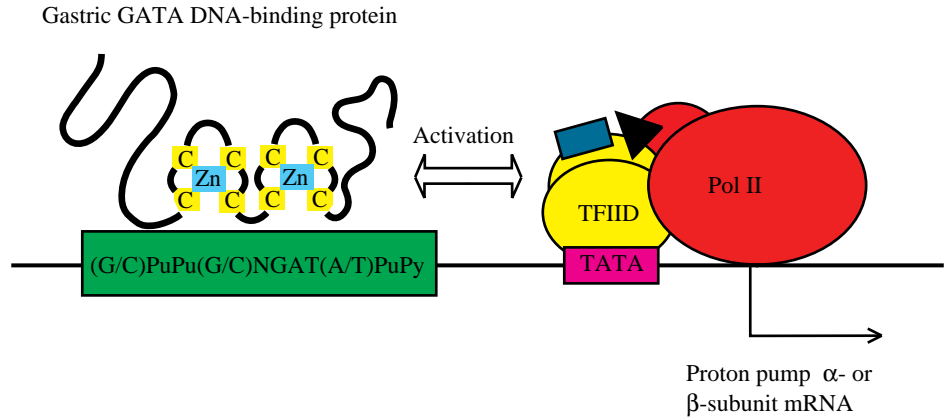

assembly is another unsolved problem, and it has already been suggested that the  $\beta$ -subunit assists the assembly of the  $\alpha$ -subunit in membranes (Horisberger *et al.* 1991; Noguchi *et al.* 1992; Ueno *et al.* 1995).

### Conclusion

The PCR amplification of cDNA from pig gastric mucosa demonstrated the presence of novel zinc-finger proteins called GATA-GT1, GATA-GT2 and GATA-GT3; each had tandem zinc-finger motifs ( $CX_2C-X_{17}-CX_2C$ ), similar to those of previously characterized GATA-binding proteins. Subsequently, full-length cDNAs of GATA-GT1 and GATA-GT2 were obtained from rat stomach. Although the amino acid residues of their zinc-finger domains were as much as 70% identical to those from other GATA-binding proteins, regions outside the zinc fingers exhibited essentially no similarity. In addition to potential protein kinase phosphorylation sites, the characteristics of the primary structures of GATA-GT1 and GATA-GT2 have been described. They were expressed predominantly in the gastric mucosa (parietal cells) and at much lower levels in intestine and testis, a tissue distribution quite distinct from that of GATA-1, GATA-2 or GATA-3. GATA-GT1 and GATA-GT2 bound to the gastric DNA sequence motif (G/C)PuPu(G/C)NGAT(A/T)PuPy in the 5'-upstream regions of the  $H^+/K^+$ -ATPase  $\alpha$ - and  $\beta$ -subunit genes. We further demonstrated that GATA-GT1 and GATA-GT2 stimulate the transcription of a reporter gene together with the 5'-upstream region of the  $\beta$ -subunit gene. These results suggest that gastric GATA DNA-binding proteins may have important roles in transcriptional activation of  $H^+/K^+$ -ATPase genes in stomach parietal cells.

This work was supported by grants from the Japanese Ministry of Education, Science and Culture, and the Japan Foundation for Applied Enzymology.

### References

- ARCECI, R. J., KING, A. A. J., SIMON, M. C., ORKIN, S. H. AND WILSON, D. B. (1993). Mouse GATA-4: a retinoic acid-inducible GATA-binding transcription factor expressed in endodermally derived tissues and heart. *Molec. cell. Biol.* **13**, 2235–2246.
- BAMBERG, K., MERCIER, F., REUBEN, M. A., KOBAYASHI, Y., MUNSON, K. B. AND SACHS, G. (1992). cDNA cloning and membrane topology of the rabbit gastric  $H^+/K^+$ -ATPase  $\alpha$ -subunit. *Biochim. biophys. Acta* **1131**, 69–77.
- CANFIELD, V. A. AND LEVENSON, R. (1991). Structural organization and transcription of the mouse gastric  $H^+,K^+$ -ATPase  $\beta$  subunit gene. *Proc. natn. Acad. Sci. U.S.A.* **88**, 8247–8251.
- CANFIELD, V. A., OKAMOTO, C. T., CHOW, D., DORFMAN, J., GROS, P., FORTE, J. G. AND LEVENSON, R. (1990). Cloning of the H,K-ATPase  $\beta$  subunit: tissue-specific expression, chromosomal assignment and relationship to Na,K-ATPase  $\beta$  subunits. *J. biol. Chem.* **265**, 19878–19884.
- CHOW, D. AND FORTE, J. G. (1995). Functional significance of the  $\beta$ -subunit for heterodimeric P-type ATPases. *J. exp. Biol.* **198**, 1–17.
- CUNNINGHAM, T. S. AND COOPER, T. (1991). Expression of the *DAL80* gene, whose product is homologous to the GATA factors and is a negative regulator of multiple nitrogen catabolic genes in *Saccharomyces cerevisiae*, is sensitive to nitrogen catabolite repression. *Molec. cell. Biol.* **14**, 3115–3129.
- DORFMAN, D. M., WILSON, D. B., BRUNS, G. A. P. AND ORKIN, S. H. (1992). Human transcription factor GATA-2: Evidence for regulation of preproendothelin-1 gene expression in endothelial cells. *J. biol. Chem.* **267**, 1279–1285.
- GRÉPIN, C., DAGNINO, L., ROBITAILLE, L., HABERSTROH, L., ANTAKLY, T. AND NEMER, M. (1994). A hormone-encoding gene identifies a

- pathway for cardiac but not skeletal muscle gene transcription. *Molec. cell. Biol.* **14**, 3115–3129.
- HAM, J., STEGER, G. AND YANIV, M. (1992). How do eukaryotic activator proteins stimulate the rate of transcription by RNA polymerase II? *FEBS Lett.* **307**, 81–86.
- HIRSCHOWITZ, B. I., KEELING, D., LEWIN, M., OKABE, S., PARSONS, M., SEWING, K., WALLMARK, B. AND SACHS, G. (1995). Pharmacological aspects of acid secretion. *Digest. Disease Sci.* **40**, 3S–23S.
- HO, I.-C., VORHEES, P., MARIN, N., OAKLEY, B. K., TSAI, S.-F., ORKIN, S. H. AND LEIDEN, J. M. (1991). Human GATA-3: A lineage-restricted transcription factor that regulates the expression of the T cell receptor  $\alpha$  gene. *EMBO J.* **10**, 1187–1192.
- HON, S. I.-P., WILSON, D. B., HEIKINHEIMO, M., TANG, Z., TING, C.-N., SIMON, M. C., LEIDEN, J. M. AND PARMACEK, M. S. (1994). The GATA-4 transcription factor transactivates the cardiac muscle-specific troponin C promoter–enhancer in nonmuscle cells. *Molec. cell. Biol.* **14**, 7517–7526.
- HORISBERGER, J. D., JAUNIN, P., REUBEN, M. A., LASATER, L. S., CHOW, D. C., FORTE, J. G., ROSSIER, B. C. AND GEERING, K. (1991). The H,K-ATPase  $\beta$ -subunit can act as a surrogate for the  $\beta$  subunit of Na,K-pumps. *J. biol. Chem.* **266**, 19131–19134.
- ITO, E., TOKI, T., ISHIHARA, H., OHTANI, H., GU, L., YOKOYAMA, M., ENGEL, J. D. AND YAMAMOTO, M. (1993). Erythroid transcription factor GATA-1 is abundantly transcribed in mouse testis. *Nature* **362**, 466–468.
- JOULIN, V., BORIES, D., ELÉOUET, J.-F., LABASTIE, M.-C., CHRÉTIEN, S., MATTÉI, M.-G. AND ROMÉO, P.-H. (1991). A T-cell specific TCR  $\delta$  DNA binding protein is a member of the human GATA family. *EMBO J.* **10**, 1809–1816.
- LANDSCHULTZ, W. H., JOHNSON, P. F. AND MCKNIGHT, L. (1988). The leucine zipper: A hypothetical structure common to a new class of DNA binding proteins. *Science* **240**, 1759–1764.
- LAVERRIERE, A. C., MACNEILL, C. M., MUELLER, C., POELMANN, R. E., BURCH, J. B. E. AND EVANCE, T. (1994). GATA-4/5/6, a subfamily of three transcription factors transcribed in developing heart and gut. *J. biol. Chem.* **269**, 23177–23184.
- LEE, M.-E., TEMIZER, D. H., CLIFFORD, J. A. AND QUERTERMUS, T. (1991). Cloning of the GATA-binding protein that regulates endothelin-1 gene expression in endothelial cells. *J. biol. Chem.* **266**, 16188–16192.
- MA, J.-Y., SONG, Y.-H., SJOSTRAND, S. E., RASK, L. AND MARDH, S. (1991). cDNA cloning of the  $\beta$  subunit of the human gastric H,K-ATPase. *Biochem. biophys. Res. Commun.* **180**, 39–45.
- MAEDA, M. (1994). Gastric proton pump (H<sup>+</sup>/K<sup>+</sup>-ATPase): structure and gene regulation through GATA DNA-binding protein(s). *J. Biochem., Tokyo* **115**, 6–14.
- MAEDA, M., ASAHARA, S., NISHI, T., MUSHIAKE, S., OKA, T., SHIMADA, S., CHIBA, T., TOHYAMA, M. AND FUTAI, M. (1995). The rat intrinsic factor gene: its 5'-upstream region and chief cell-specific transcription. *J. Biochem., Tokyo* **117**, 1305–1311.
- MAEDA, M., ISHIZAKI, J. AND FUTAI, M. (1988). cDNA cloning and sequence determination of pig gastric (H<sup>+</sup>+K<sup>+</sup>)-ATPase. *Biochem. biophys. Res. Commun.* **157**, 203–209.
- MAEDA, M., OSHIMAN, K., TAMURA, S. AND FUTAI, M. (1990). Human gastric (H<sup>+</sup>+K<sup>+</sup>)-ATPase gene: similarity to (Na<sup>+</sup>+K<sup>+</sup>)-ATPase genes in exon/intron organization but difference in control region. *J. biol. Chem.* **265**, 9027–9032.
- MAEDA, M., OSHIMAN, K., TAMURA, S., KAYA, S., MAHMOOD, S., REUBEN, M. A., LASATER, L. S., SACHS, G. AND FUTAI, M. (1991). The rat H<sup>+</sup>/K<sup>+</sup>-ATPase  $\beta$  subunit gene and recognition of its control region by gastric DNA binding protein. *J. biol. Chem.* **266**, 21584–21588.
- MARTIN, F., PRANDINI, M.-H., THEVENON, D., MARGUERIE, G. AND UZAN, G. (1993). The transcription factor GATA-1 regulates the promoter activity of the platelet glycoprotein IIb gene. *J. biol. Chem.* **268**, 21606–21612.
- MERIKA, M. AND ORKIN, S. H. (1995). Functional synergy and physical interactions of the erythroid transcription factor GATA-1 with the Krüppel family proteins Sp1 and EKLf. *Molec. cell. Biol.* **15**, 2437–2447.
- MINEHART, M. AND MAGASANIK, B. (1991). Sequence and expression of *GLN3*, a positive nitrogen regulatory gene of *Saccharomyces cerevisiae* encoding a protein with a putative zinc finger DNA-binding domain. *Molec. cell. Biol.* **11**, 6216–6228.
- MOLKENTIN, J. D., KALVAKOLANU, D. V. AND MARKHAM, B. E. (1994). Transcription factor GATA-4 regulates cardiac muscle-specific expression of the  $\alpha$ -myosin heavy-chain gene. *Molec. cell. Biol.* **14**, 1947–1957.
- MORLEY, G. P., CALLAGHAN, J. M., ROSE, B. R., TOH, B. H., GLEESON, P. A. AND VAN DRIEL, I. R. (1992). The mouse gastric H,K-ATPase  $\beta$  subunit: gene structure and co-ordinate expression with the  $\alpha$  subunit during ontogeny. *J. biol. Chem.* **267**, 1165–1174.
- MUSHIAKE, S., SHIMADA, S., TOHYAMA, M., MAEDA, M., HASEBE, M. AND FUTAI, M. (1994). Genes for members of the GATA-binding protein family (GATA-GT1 and GATA-GT2) together with H<sup>+</sup>/K<sup>+</sup>-ATPase are specifically transcribed in gastric parietal cells. *FEBS Lett.* **340**, 117–120.
- NEWMAN, P. R., GREEB, J., KEETON, T. P., REYES, A. A. AND SHULL, G. E. (1990). Structure of the human gastric H,K-ATPase gene and comparison of the 5'-flanking sequences of the human and rat genes. *DNA Cell Biol.* **9**, 749–762.
- NEWMAN, P. R. AND SHULL, G. E. (1991). Rat gastric H,K-ATPase  $\beta$ -subunit gene: intron/exon organization, identification of multiple transcription initiation sites and analysis of the 5'-flanking region. *Genomics* **11**, 252–262.
- NISHI, T., KOIKE, T., OKA, T., MAEDA, M. AND FUTAI, M. (1995). Identification of the promoter region of the human histamine H2 receptor gene. *Biochem. biophys. Res. Commun.* **210**, 616–623.
- NOGUCHI, S., MAEDA, M., FUTAI, M. AND KAWAMURA, M. (1992). Assembly of a hybrid from the  $\alpha$  subunit of Na<sup>+</sup>/K<sup>+</sup>-ATPase and the  $\beta$  subunit of H<sup>+</sup>/K<sup>+</sup>-ATPase. *Biochem. biophys. Res. Commun.* **182**, 659–666.
- OMICINSKI, J. G., CLORE, G. M., SCHAAD, O., FELSENFELD, G., TRAINOR, C., APPELLA, E., STAHL, S. J. AND GRONENBORN, A. M. (1993). NMR structure of a specific DNA complex of Zn-containing DNA binding domain of GATA-1. *Science* **261**, 438–446.
- ORKIN, S. H. (1990). Globin gene regulation and switching: circa 1990. *Cell* **63**, 665–672.
- OSHIMAN, K., MOTOJIMA, K., MAHMOOD, S., SHIMADA, A., TAMURA, S., MAEDA, M. AND FUTAI, M. (1991). Control region and gastric specific transcription of the rat H<sup>+</sup>,K<sup>+</sup>-ATPase  $\alpha$  subunit gene. *FEBS Lett.* **281**, 250–254.
- REUBEN, M. A., LASATER, L. A. AND SACHS, G. (1990). Characterization of a  $\beta$  subunit of the gastric H<sup>+</sup>/K<sup>+</sup>-transporting ATPase. *Proc. natn. Acad. Sci. U.S.A.* **87**, 6767–6771.
- ROEDER, R. G. (1991). The complexities of eukaryotic transcription initiation: regulation of preinitiation complex assembly. *Trends biochem. Sci.* **16**, 402–408.
- SHULL, G. E. (1990). cDNA cloning of the  $\beta$  subunit of the rat gastric H,K-ATPase. *J. biol. Chem.* **265**, 12123–12126.

- SHULL, G. E. AND LINGREL, J. B. (1986). Molecular cloning of the rat ( $H^+$ + $K^+$ )-ATPase. *J. biol. Chem.* **261**, 16788–16791.
- SONG, I., MORTELL, M. P., GANZTZ, I., BROWN, D. R. AND YAMADA, T. (1993). Molecular cloning and structural analysis of canine gastric  $H^+$ , $K^+$ -ATPase. *Biochem. biophys. Res. Commun.* **196**, 1240–1247.
- SUZUKI, M. (1989). SPXX, a frequent sequence motif in gene regulatory proteins. *J. molec. Biol.* **207**, 61–84.
- TAMURA, S., OSHIMAN, K., NISHI, T., MORI, M., MAEDA, M. AND FUTAI, M. (1992). Sequence motif in control regions of the  $H^+$ / $K^+$  ATPase  $\alpha$  and  $\beta$  subunit genes recognized by gastric specific nuclear protein(s). *FEBS Lett.* **298**, 137–141.
- TAMURA, S., WANG, X.-H., MAEDA, M. AND FUTAI, M. (1993). Novel gastric DNA binding proteins recognize upstream sequence motifs of parietal cell-specific genes. *Proc. natn. Acad. Sci. U.S.A.* **90**, 10876–10880.
- TOH, B.-H., GLEESON, P. A., SIMPSON, R. J., MORITZ, R. L., CALLAGHAN, J. M., GOLDKORN, I., JONES, C., MARTINELLI, T. M., MU, F.-T., HUMPHRIS, D. C., PETTITT, J. M., MORI, Y., MASUDA, T., SOBIESZCZUK, P., WEINSTOCK, J., MANTAMADIOTIS, T. AND BALDWIN, G. (1990). The 60- to 90-kDa parietal cell autoantigen associated with autoimmune gastritis is a  $\beta$  subunit of the gastric  $H^+$ / $K^+$ -ATPase (proton pump). *Proc. natn. Acad. Sci. U.S.A.* **87**, 6418–6422.
- TRAINOR, C. D., EVANS, T., FELSENFELD, G. AND BOGUSKI, M. S. (1990). Structure and evolution of a human erythroid transcription factor. *Nature* **343**, 92–96.
- UENO, S., KUSABA, M., TAKEDA, K., MAEDA, M., FUTAI, M., IZUMI, F. AND KAWAMURA, M. (1995). Functional consequences of substitution of the disulfide-bonded segment, Cys127–Cys150, located in the extracellular domain of the Na,K-ATPase  $\beta$  subunit: Arg148 is essential for the functional expression of Na,K-ATPase. *J. Biochem., Tokyo* **117**, 591–596.
- VIEILLE-GROSJEAN, I. AND HUBER, P. (1995). Transcription factor GATA-1 regulates human *HOXB2* gene expression in erythroid cells. *J. biol. Chem.* **270**, 4544–4550.
- YAMAMOTO, M., KO, L.-J., LEONARD, M. W., BEUG, H., ORKIN, S. H. AND ENGEL, J. D. (1990). Activity and tissue-specific expression of the transcription factor NF-E1 multigene family. *Genes Dev.* **4**, 1650–1662.
- YANG, H.-Y. AND EVANCE, T. (1992). Distinct roles for the two cGATA-1 finger domains. *Molec. cell. Biol.* **12**, 4562–4570.
- YU, H., ISHII, T., PEARSON, W. R. AND TAKEYASU, K. (1994). Primary structure of avian  $H^+$ / $K^+$ -ATPase  $\beta$ -subunit. *Biochim. biophys. Acta* **1190**, 189–192.
- ZON, L. I., MATHER, C., BURGESS, S., BOLCE, M. E., HARLAND, R. M. AND ORKIN, S. H. (1991). Expression of GATA-binding proteins during embryonic development in *Xenopus laevis*. *Proc. natn. Acad. Sci. U.S.A.* **88**, 10642–10646.
- ZON, L. I., TSAI, S.-F., BURGESS, S., MATSUDAIRA, P., BRUNS, G. A. P. AND ORKIN, S. H. (1990). The major human erythroid DNA-binding protein (GF-1): Primary sequence and localization of the gene to the X chromosome. *Proc. natn. Acad. Sci. U.S.A.* **87**, 668–672.
